# Supplementary material
Source: PubMed Central journal article supplement (PMC1502509)

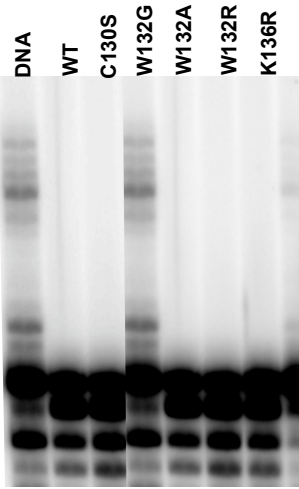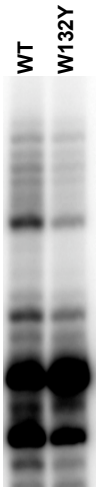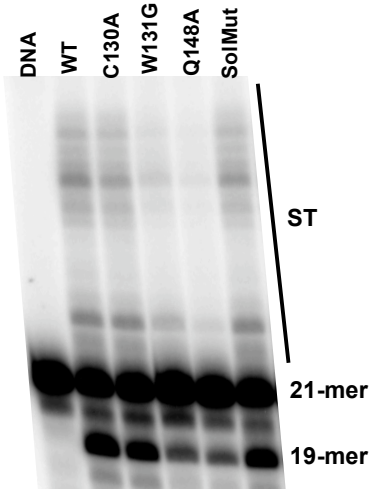

Supplement: pnas_0511254103_1.pdf [file pnas_0511254103_1.pdf]

DNA  
WT

3

SoIMut

3

DNA  
C130S

3

W132G

3

ST

19-mer

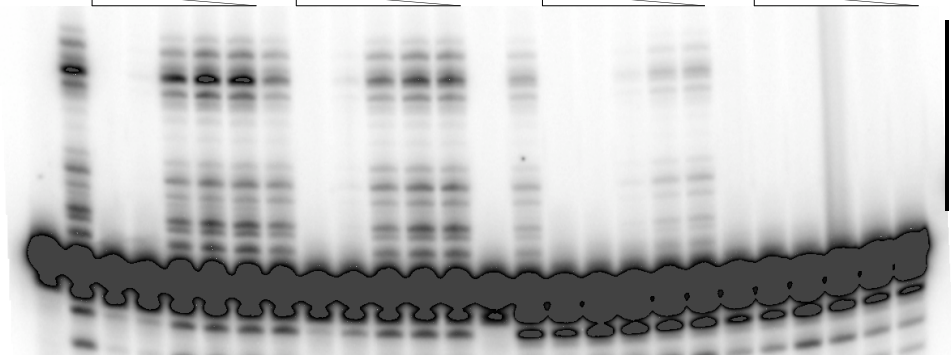

Supplement: pnas_0511254103_2.pdf [file pnas_0511254103_2.pdf]

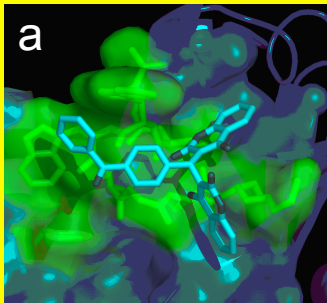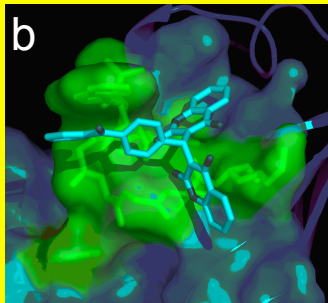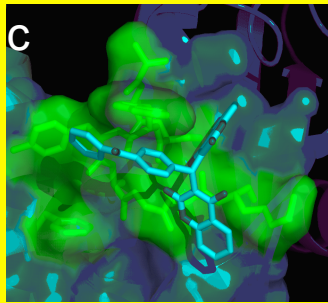

Supplement: pnas_0511254103_3.pdf [file pnas_0511254103_3.pdf]

**A**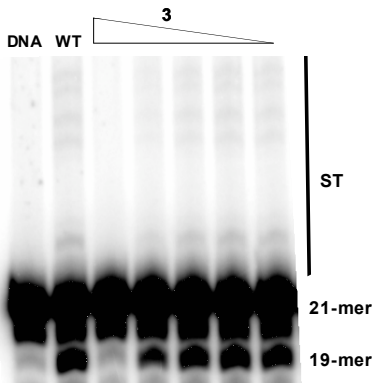**B**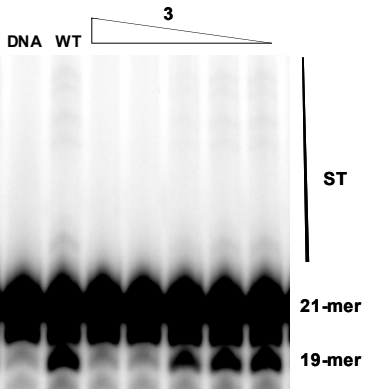

Supplement: pnas_0511254103_4.pdf [file pnas_0511254103_4.pdf]
